# Supplementary material
Source: HighWire-hosted journal article supplement (https://erj.ersjournals.com/content/55/2/1902012)
Supplement: inline-supplementary-material-1 [file inline-supplementary-material-1.pdf]

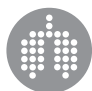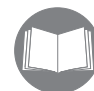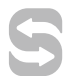

SHAREABLE PDF

# Training curriculum for European thoracic surgeons: a joint initiative of the European Society of Thoracic Surgeons and the European Respiratory Society

Gilbert Massard<sup>1</sup>, Nathalie Tabin<sup>2</sup>, Lars Konge<sup>3</sup>, Anna Elisabeth Frick<sup>4</sup>, Hasan Batirel<sup>5</sup>, Alessandro Brunelli<sup>6</sup>, Stefano Elia<sup>7</sup>, Martin Huertgen<sup>8</sup>, Laureano Molins<sup>9</sup>, Kostas Papagiannopoulos<sup>6</sup>, Dragan Subotic<sup>10</sup>, Paul van Schil<sup>11</sup>, Gonzalo Varela<sup>12</sup> and Dirk van Raemdonck<sup>13</sup>

**Affiliations:** <sup>1</sup>Dept of Medical Education, University of Luxembourg, Luxembourg, Luxembourg. <sup>2</sup>European Respiratory Society, Lausanne, Switzerland. <sup>3</sup>Copenhagen Academy for Medical Education and Simulation, Copenhagen, Denmark. <sup>4</sup>Dept of Thoracic Surgery, Vienna General Hospital, Vienna, Austria. <sup>5</sup>Dept of Thoracic Surgery, Marmara University Medical School, Istanbul, Turkey. <sup>6</sup>Dept of Thoracic Surgery, St James's University Hospital, Leeds, UK. <sup>7</sup>Dept of Thoracic Surgery, University of Rome Tor Vergata, Rome, Italy. <sup>8</sup>Clinic of Thoracic Surgery, Catholic Clinic Koblenz-Montabaur, Koblenz, Germany. <sup>9</sup>Respiratory Institute, Barcelona, Spain. <sup>10</sup>University Hospital Basel, Basel, Switzerland. <sup>11</sup>Dept of Thoracic and Vascular Surgery, Antwerp University Hospital and Antwerp University, Antwerp, Belgium. <sup>12</sup>Salamanca Institute of Biomedical Research, Salamanca, Spain. <sup>13</sup>Dept of Thoracic Surgery, University Hospitals Leuven, Leuven, Belgium.

**Correspondence:** Gilbert Massard, Dept of Medical Education, University of Luxembourg, 2, avenue de l'Université, L-4365 Esch-sur-Alzette, Grand-Duchy of Luxembourg. E-mail: gilbert.massard@uni.lu

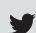

@ERSpublications

This consensual curriculum for thoracic surgeons intends to promote homogeneity of training and its outcome in terms of competence throughout Europe <http://bit.ly/3a2tTZI>

**Cite this article as:** Massard G, Tabin N, Konge L, *et al.* Training curriculum for European thoracic surgeons: a joint initiative of the European Society of Thoracic Surgeons and the European Respiratory Society. *Eur Respir J* 2020; 55: 1902012 [<https://doi.org/10.1183/13993003.02012-2019>].

This single-page version can be shared freely online.

In the most recent issue of the *European Journal of Cardio-Thoracic Surgery*, the joint task force group on training in thoracic surgery, set up by both the European Society of Thoracic Surgeons and the European Respiratory Society (ERS), has published the core document describing the recommended training curriculum [1]. This document takes its roots from the European syllabus published in 2018 [2, 3]. According to a methodology validated by education scientists, the working group has described, for each item, the expected level of competence in terms of knowledge, skills and attitudes, listed possible learning resources, and recommended appropriate tools for assessment of learning outcomes [4]. The task force group utilised Bloom's taxonomy to characterise learning domains and Miller's model of competence for clinical skills [5, 6]. Attitudes and non-technical skills were described according to the CanMEDS physician competency framework edited by the Royal College of Physicians and Surgeons of Canada [7, 8].
